# Supplementary material for: Non-heme iron(ii) complexes are efficient olefin aziridination catalysts
Source: Royal Society of Chemistry journal article supplement (doi:10.1039/b700493a), 2007-01-01
Supplement: b700493a.pdf [file b700493a.pdf]

## Non-heme iron(II) complexes are efficient olefin aziridination catalysts

Katie L. Klotz, Luke M. Slominski, Anthony V. Hull, Victoria M. Gottsacker, Rubén Mas-Ballesté, Lawrence Que, Jr.,\* and Jason A. Halfen<sup>a,\*</sup>

Synthetic details and characterization data for **1**

[(Me<sub>5</sub>dien)Fe(O<sub>3</sub>SCF<sub>3</sub>)<sub>2</sub>] (**1**): Fe(CF<sub>3</sub>SO<sub>3</sub>)<sub>2</sub>·2CH<sub>3</sub>CN (0.3547 g, 0.000814 mol) and Me<sub>5</sub>dien (0.1389 g, 0.000802 mol) were combined in THF (5 ml) and stirred until a clear solution was obtained. A small amount of Et<sub>2</sub>O was added to this solution, resulting in the deposition of a brown solid. This solid was removed by filtration, and the filtrate was treated with a large volume of Et<sub>2</sub>O (> 10 ml) to provide the product, **1**, as a white solid, (0.262 g, 62%). <sup>1</sup>H NMR (400 MHz, CD<sub>3</sub>CN) δ 138.6 (6H), 123.4 (2H), 107.9 (6H), 92.4 (3H), 81.0 (2H), 80.2 (2H), 59.0 (2H) ppm; μ<sub>eff</sub>(solid, 25 °C) = 4.97 μ<sub>B</sub>; FTIR (KBr, cm<sup>-1</sup>) 2980, 2885, 1472, 1264, 1161, 1027, 936, 802, 633, 577, 521; Anal. Calcd for C<sub>11</sub>H<sub>23</sub>F<sub>6</sub>FeN<sub>3</sub>O<sub>6</sub>S<sub>2</sub>: C, 25.06; H, 4.40; N, 7.97. Found: C, 24.65; H, 4.52; N, 7.80.
